# Supplementary material for: Phenotypic screening and molecular characterization of cassava mosaic disease resistance in Côte d'Ivoire cassava germplasm
Source: Frontiers journal article supplement (doi:10.3389/fsufs.2022.1052437), 2023-01-19
Supplement: Table_1.xlsx [file Table_1.xlsx]

## Sheet: Feuil1
N°	Accession name	Origin	Accession type	ACMV	EACMCV	CMD1 (SSRY40)	CMD2 (RME1)	CMD2 (NS169)	CMD3 (NS198)
1	43	Côte d'Ivoire	Local	Positive	Negative	Positive	Negative	Positive	Positive
5	CM17	Côte d'Ivoire	Improved	Negative	Negative	Positive	Negative	Positive	Positive
6	Ka13	Kenya	Improved	Negative	Negative	Positive	Negative	Positive	Positive
7	Ka23	Kenya	Improved	Negative	Negative	Positive	Negative	Positive	Positive
8	N°35	Côte d'Ivoire	Local	Negative	Negative	Positive	Positive	Positive	Positive
2	TMS00/0388	IITA-Nigeria	Improved	Negative	Negative	Positive	Positive	Positive	Positive
28	15(146)10	IITA-Nigeria	Improved	Positive	Negative	Positive	Positive	Positive	Positive
44	9620A(Bocou3)	Côte d'Ivoire	Improved	Positive	Negative	Positive	Negative	Negative	Positive
56	Agba kangba3	Côte d'Ivoire	Local	Negative	Negative	Positive	Positive	Positive	Positive
57	AY14(2)	Côte d'Ivoire	Local	Negative	Negative	Negative	Negative	Negative	Negative
58	AY4	Côte d'Ivoire	Local	Negative	Negative	Negative	Negative	Negative	Negative
59	Bahanin bou	Côte d'Ivoire	Local	Positive	Negative	Positive	Positive	Positive	Positive
60	Bonoua34	Côte d'Ivoire	Local	Negative	Negative	Positive	Negative	Positive	Positive
61	Bou fouh4	Côte d'Ivoire	Local	Positive	Negative	Positive	Positive	Positive	Positive
62	Koko3	Côte d'Ivoire	Local	Positive	Negative	Positive	Positive	Positive	Positive
63	M98/0068 (Bocou6)	Côte d'Ivoire	Improved	Positive	Negative	Positive	Positive	Positive	Positive
64	M98/0115	IITA-Nigeria	Improved	Positive	Negative	Positive	Positive	Positive	Positive
65	MM96/4496	IITA-Nigeria	Improved	Negative	Negative	Positive	Negative	Positive	Positive
66	MM96/5280	IITA-Nigeria	Improved	Positive	Negative	Positive	Positive	Positive	Positive
67	MM96/JW1	IITA-Nigeria	Improved	Positive	Negative	Positive	Positive	Positive	Positive
68	N°37b	Côte d'Ivoire	Local	Positive	Negative	Positive	Negative	Positive	Positive
69	TME4/9	IITA-Nigeria	Improved	Positive	Negative	Positive	Positive	Positive	Positive
70	TME693	IITA-Nigeria	Improved	Negative	Negative	Positive	Negative	Positive	Positive
9	TMS00/0028	IITA-Nigeria	Improved	Negative	Negative	Positive	Positive	Positive	Positive
10	TMS00/0363	IITA-Nigeria	Improved	Positive	Negative	Positive	Positive	Positive	Positive
11	TMS01/0014	IITA-Nigeria	Improved	Positive	Negative	Positive	Positive	Positive	Positive
12	TMS01/0090	IITA-Nigeria	Improved	Positive	Negative	Positive	Positive	Positive	Positive
13	TMS01/1115	IITA-Nigeria	Improved	Positive	Negative	Positive	Positive	Positive	Positive
14	TMS01/1206	IITA-Nigeria	Improved	Positive	Negative	Positive	Positive	Positive	Positive
15	TMS01/1235	IITA-Nigeria	Improved	Negative	Negative	Positive	Negative	Positive	Positive
16	TMS01/1273	IITA-Nigeria	Improved	Negative	Negative	Positive	Positive	Positive	Positive
17	TMS01/1277	IITA-Nigeria	Improved	Negative	Negative	Positive	Positive	Positive	Positive
18	TMS01/1368	IITA-Nigeria	Improved	Negative	Negative	Positive	Positive	Positive	Positive
19	TMS01/1371	IITA-Nigeria	Improved	Positive	Negative	Positive	Positive	Positive	Positive
20	TMS01/1380	IITA-Nigeria	Improved	Positive	Negative	Positive	Positive	Positive	Positive
21	TMS01/1404	IITA-Nigeria	Improved	Negative	Negative	Positive	Positive	Positive	Positive
22	TMS01/1412	IITA-Nigeria	Improved	Positive	Negative	Positive	Positive	Positive	Positive
23	TMS01/1413	IITA-Nigeria	Improved	Positive	Negative	Positive	Positive	Positive	Positive
24	TMS01/1646	IITA-Nigeria	Improved	Negative	Negative	Positive	Positive	Positive	Positive
25	TMS01/1649	IITA-Nigeria	Improved	Negative	Negative	Positive	Positive	Positive	Positive
26	TMS01/1662	IITA-Nigeria	Improved	Positive	Negative	Positive	Positive	Positive	Positive
27	TMS01/1663	IITA-Nigeria	Improved	Negative	Negative	Positive	Positive	Positive	Positive
71	TMS30555	IITA-Nigeria	Improved	Negative	Negative	Positive	Negative	Positive	Positive
72	TMS30572	IITA-Nigeria	Improved	Negative	Negative	Positive	Positive	Positive	Positive
3	TMS91/02312	IITA-Nigeria	Improved	Negative	Negative	Positive	Positive	Positive	Positive
29	TMS91/02324	IITA-Nigeria	Improved	Positive	Negative	Positive	Positive	Positive	Positive
30	TMS92B/00068	IITA-Nigeria	Improved	Negative	Negative	Positive	Positive	Positive	Positive
31	TMS94/0006	IITA-Nigeria	Improved	Positive	Negative	Positive	Positive	Positive	Positive
32	TMS94/0039	IITA-Nigeria	Improved	Positive	Negative	Positive	Positive	Positive	Positive
33	TMS94/0330	IITA-Nigeria	Improved	Positive	Negative	Positive	Positive	Positive	Positive
34	TMS95/0166	IITA-Nigeria	Improved	Negative	Negative	Positive	Negative	Positive	Positive
35	TMS95/0289(Bocou8)	IITA-Nigeria	Improved	Negative	Negative	Positive	Negative	Positive	Positive
36	TMS96/0603	IITA-Nigeria	Improved	Positive	Negative	Positive	Positive	Positive	Positive
37	TMS96/1432	IITA-Nigeria	Improved	Positive	Negative	Positive	Positive	Positive	Positive
38	TMS96/1565	IITA-Nigeria	Improved	Negative	Negative	Positive	Positive	Positive	Positive
39	TMS96/1569	IITA-Nigeria	Improved	Negative	Negative	Positive	Positive	Positive	Positive
40	TMS96/1630	IITA-Nigeria	Improved	Positive	Negative	Positive	Positive	Positive	Positive
41	TMS96/1632	IITA-Nigeria	Improved	Positive	Negative	Positive	Positive	Positive	Positive
42	TMS96/1642	IITA-Nigeria	Improved	Negative	Negative	Positive	Positive	Positive	Positive
43	TMS96/1708	IITA-Nigeria	Improved	Negative	Negative	Positive	Positive	Positive	Positive
45	TMS97/2205	IITA-Nigeria	Improved	Positive	Negative	Positive	Negative	Positive	Positive
46	TMS97/3200	IITA-Nigeria	Improved	Positive	Negative	Positive	Positive	Positive	Positive
47	TMS97/4763	IITA-Nigeria	Improved	Negative	Negative	Positive	Positive	Positive	Positive
48	TMS97/4779	IITA-Nigeria	Improved	Negative	Negative	Positive	Positive	Positive	Positive
49	TMS98/0002	IITA-Nigeria	Improved	Positive	Negative	Positive	Negative	Negative	Positive
50	TMS98/0581(Bocou5)	IITA-Nigeria	Improved	Negative	Negative	Positive	Positive	Positive	Positive
51	TMS98/2101	IITA-Nigeria	Improved	Negative	Negative	Positive	Positive	Positive	Positive
52	TMS98/2132	IITA-Nigeria	Improved	Positive	Negative	Positive	Positive	Positive	Positive
53	TMS98/2226	IITA-Nigeria	Improved	Negative	Negative	Positive	Positive	Positive	Positive
4	TMS99/0240	IITA-Nigeria	Improved	Negative	Negative	Positive	Positive	Positive	Positive
54	TMS99/0554	IITA-Nigeria	Improved	Positive	Negative	Negative	Positive	Positive	Negative
55	TMS99/2123	IITA-Nigeria	Improved	Negative	Negative	Positive	Positive	Positive	Positive
